# Supplementary material
Source: MDPI journal article supplement (https://www.mdpi.com/1424-2818/15/7/868)
Supplement: s1 [file s1]

Archive with 5 entries (5 files):
- Supplementary Figures S1-S3.pdf
- Supplementary Table S1 Sample sequencing information of fungi in rhizosphere of P. squamata.xlsx
- Supplementary Table S2 Network nodes of fungi in rhizosphere of P. squamata.xlsx
- Supplementary Table S3 Network centrality of fungi in rhizosphere of P. squamata.xlsx
- Supplementary Table S4 Relationships between soil physicochemical parameters and fungal community variation at phylum level in rhizosphere of P. squamata.xlsx
