# Supplementary material
Source: MDPI journal article supplement (https://www.mdpi.com/1424-2818/15/7/868)
Supplement: s1 [file s1 › Supplementary Figures S1-S3.pdf]

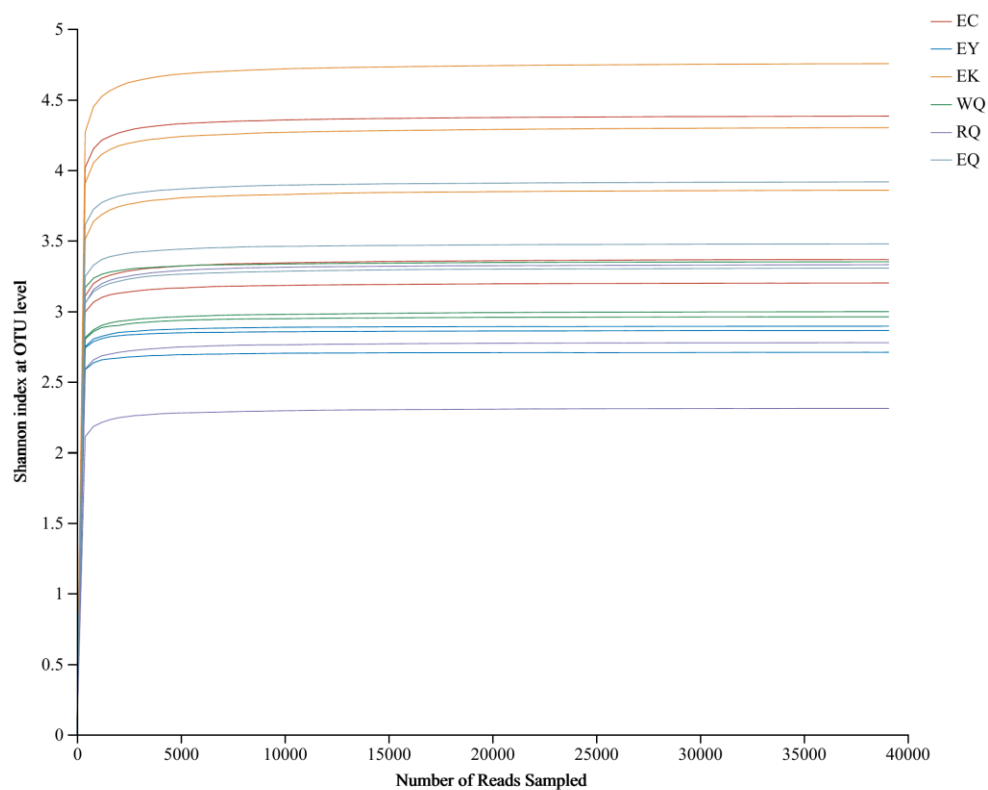

Figure S1. Rarefaction curves of fungal community in rhizosphere of *P. squamata*.

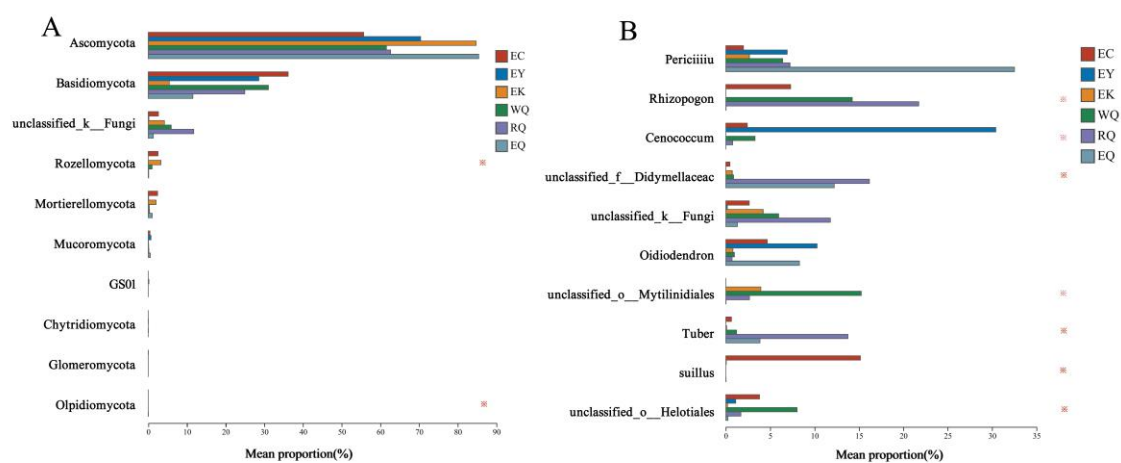

Figure S2. Difference analysis of fungal communities in rhizosphere of *P. squamata*.

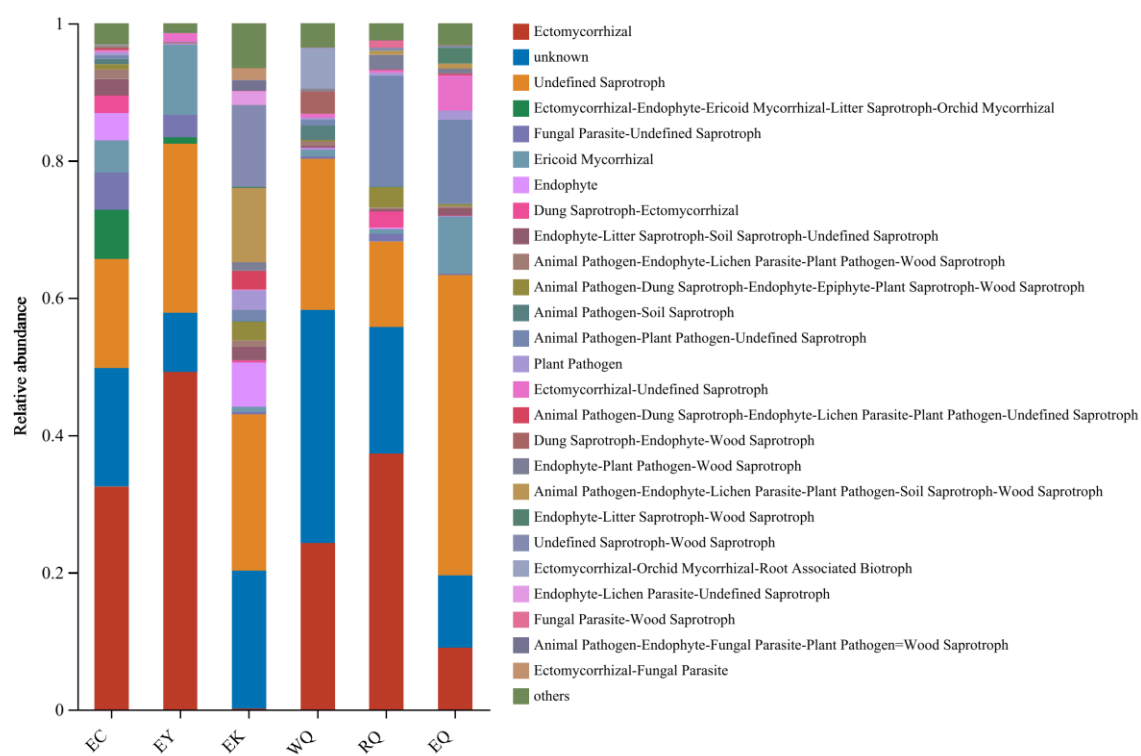

Figure S3. FUNGuild Function prediction in rhizosphere of *P. squamata*.
