# Supplementary material
Source: MDPI journal article supplement (https://www.mdpi.com/1424-2818/15/7/868)
Supplement: s1 [file s1 › Supplementary Table S1 Sample sequencing information of fungi in rhizosphere of P. squamata.xlsx]

## Sheet: Supplementary Table S1 
Sample\Info	Seq_num	Base_num	Mean_length	Min_length	Max_length
EQ2	69772	21707959	311.127	145	524
RQ2	43686	15804866	361.783	140	454
RQ3	68087	21256340	312.194	140	522
RQ1	70148	24181780	344.725	152	501
EQ1	69489	21725821	312.651	141	519
EK1	74748	23254482	311.105	146	540
EK2	71905	22302857	310.171	153	528
EK3	70078	21875563	312.16	140	527
WQ3	71308	22877049	320.82	161	534
WQ2	63215	21587775	341.498	151	502
WQ1	73337	24001166	327.272	165	517
EY1	54536	17107622	313.694	140	532
EY3	73729	22994033	311.872	149	510
EY2	72530	23345705	321.877	152	503
EC3	71431	22694893	317.718	140	504
EC2	71532	23768838	332.283	144	517
EC1	45116	15210912	337.151	154	462
EQ3	62993	20512263	325.628	145	508
