# Supplementary material
Source: MDPI journal article supplement (https://www.mdpi.com/1424-2818/15/7/868)
Supplement: s1 [file s1 › Supplementary Table S2 Network nodes of fungi in rhizosphere of P. squamata.xlsx]

## Sheet: Supplementary Table S2 
node name	degree	clustering
g__unclassified_f__Didymellaceae	5	0.5
g__Saitozyma	5	0.4
g__Tuber	4	0.166667
g__Chrysosporium	5	0.4
g__Tomentella	2	1
g__Cenococcum	8	0.321429
g__unclassified_o__Mytilinidiales	6	0.333333
g__Suillus	4	0.5
g__Tylospora	2	0
g__unclassified_k__Fungi	4	0.333333
g__unclassified_p__Ascomycota	1	0
g__Fusarium	8	0.392857
g__Infundichalara	5	0.7
g__unclassified_o__Helotiales	3	1
g__Oidiodendron	6	0.333333
g__Sagenomella	3	1
g__Rhizopogon	2	0
g__Trichoderma	1	0
