# Supplementary material
Source: MDPI journal article supplement (https://www.mdpi.com/1424-2818/15/7/868)
Supplement: s1 [file s1 › Supplementary Table S3 Network centrality of fungi in rhizosphere of P. squamata.xlsx]

## Sheet: Supplementary Table S3 
Node ID	Node Name	Degree Centrality	Closeness Centrality	Betweenness Centrality
1	g__unclassified_f__Didymellaceae	0.294118	0.53125	0.13174
2	g__Saitozyma	0.294118	0.53125	0.0893382
3	g__Tuber	0.235294	0.5	0.234926
4	g__Chrysosporium	0.294118	0.485714	0.0558824
5	g__Tomentella	0.117647	0.395349	0
6	g__Cenococcum	0.470588	0.586207	0.213358
7	g__unclassified_o__Mytilinidiales	0.352941	0.53125	0.103064
8	g__Suillus	0.235294	0.435897	0.0343137
9	g__Tylospora	0.117647	0.386364	0.00514706
10	g__unclassified_k__Fungi	0.235294	0.5	0.0606618
11	g__unclassified_p__Ascomycota	0.0588235	0.377778	0
12	g__Fusarium	0.470588	0.586207	0.161275
13	g__Infundichalara	0.294118	0.485714	0.0143382
14	g__unclassified_o__Helotiales	0.176471	0.414634	0
15	g__Oidiodendron	0.352941	0.566667	0.175368
16	g__Sagenomella	0.176471	0.425	0
17	g__Rhizopogon	0.117647	0.354167	0.117647
18	g__Trichoderma	0.0588235	0.265625	0
