# Supplementary material
Source: MDPI journal article supplement (https://www.mdpi.com/1424-2818/15/7/868)
Supplement: s1 [file s1 › Supplementary Table S4 Relationships between soil physicochemical parameters and fungal community variation at phylum level in rhizosphere of P. squamata.xlsx]

## Sheet: Supplementary Table S4 
	RDA1	RDA2	r2	p_values
pH	0.9094	-0.4158	0.3228	0.039
OM	0.804	-0.5946	0.0348	0.79
TN	0.8893	-0.4573	0.0081	0.952
TP	0.3909	-0.9204	0.1907	0.202
TK	-0.9813	0.1926	0.5503	0.004
AN	-0.9786	0.2056	0.0272	0.83
AP	0.4227	-0.9063	0.486	0.005
AK	0.9925	-0.1219	0.1394	0.316
